# Supplementary material for: Identification of two molecular subtypes in canine mast cell tumours through gene expression profiling
Source: PLOS journal article supplement (doi:10.1371/journal.pone.0217343), 2019-06-19

**S2 Fig. Ki67 index.** Comparison of Ki67 indices between low-risk and high-risk MCTs. ( $P = 0.0044$ )

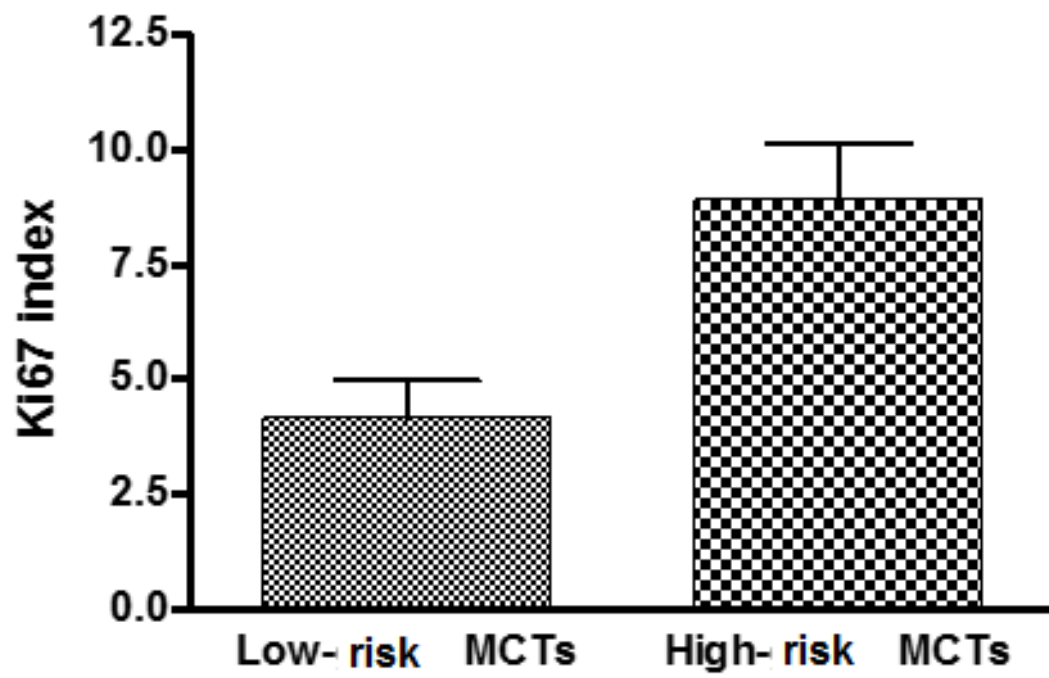

Supplement: S2 (10.1371/journal.pone.0217343.s002) [file journal.pone.0217343.s002]
